# Supplementary material for: Transcriptomic and metabonomic profiling unveils the mechanism of Tartary buckwheat and kiwi co-fermentation products in hyperlipidemia treatment
Source: Front Pharmacol. 2025 May 30;16:1572593. doi: 10.3389/fphar.2025.1572593 (PMC12162925; doi:10.3389/fphar.2025.1572593)
Supplement: Supplementary file 7 [file DataSheet1.xlsx]

## Sheet: Sheet1
Supplementary File 1
name	formula	KEGG	FC	P.value	FDR	VIP	posneg
Tetracaine	C15H24N2O2	C07526	0.03	4.45865e-07	0.000119515	1.45262	pos
1-Hexadecanol	C16H34O	C00823	0.06	0.000940756	0.00865371	1.4501	pos
Trioxsalen	C14H12O3	C09314	0.09	8.35399e-08	5.84848e-05	1.45304	pos
Phenylacetylglycine	C10H11NO3	C05598	0.11	0.141526	0.293641	1.10719	pos
Lithocholic acid	C24H40O3	C03990	0.13	0.000356582	0.00436263	1.43091	pos
Nobiletin	C21H22O8	C10112	0.14	0.0223657	0.0836369	1.2722	pos
cis-4-Hydroxy-D-proline	C5H9NO3	C03440	0.14	6.61387e-06	0.000424249	1.4504	pos
4-Hydroxycinnamoylagmatine	C14H20N4O2	C04498	0.15	0.000526718	0.00574017	1.42599	pos
2-Oxoarginine	C6H11N3O3	C03771	0.18	0.000282167	0.00377595	1.43345	pos
Sphinganine	C18H39NO2	C00836	0.18	7.26729e-05	0.00159113	1.44335	pos
S-Adenosylhomocysteine	C14H20N6O5S	C00021	0.23	0.0692074	0.182565	1.12879	pos
Norepinephrine	C8H11NO3	C00547	0.24	0.0140682	0.0599909	1.31	pos
N-Acetylglutamic acid	C7H11NO5	C00624	0.24	0.041581	0.128731	1.204	pos
(13E)-11a-Hydroxy-9,15-dioxoprost-13-enoic acid	C20H32O5	C04654	0.28	0.000762185	0.00743009	1.42047	pos
2-Hydroxyadipic acid	C6H10O5	C02360	0.28	0.00144025	0.0116125	1.40794	pos
Phosphorylcholine	C5H15NO4P	C00588	0.29	0.000210759	0.00310805	1.43609	pos
Lupeol	C30H50O	C08628	0.29	0.141273	0.293356	0.980807	pos
DHHA	C7H9NO3	C19830	0.3	0.0415732	0.128731	1.20399	pos
Capsidiol	C15H24O2	C09627	0.34	0.0614785	0.168412	1.14864	pos
(S)-2,3-Epoxysqualene	C30H50O	C01054	0.35	0.287324	0.468669	0.760102	pos
6-Acetyl-D-glucose	C8H14O7	C02655	0.38	0.0921162	0.221304	1.21314	pos
Prostaglandin G2	C20H32O6	C05956	0.4	0.000285924	0.00380875	1.43338	pos
13-L-Hydroperoxylinoleic acid	C18H32O4	C04717	0.4	1.69427e-05	0.000697757	1.44853	pos
Acetylphosphate	C2H5O5P	C00227	0.43	0.125525	0.272236	1.1414	pos
13(S)-HpOTrE	C18H30O4	C04785	0.44	2.60423e-05	0.000886192	1.44739	pos
3-Dehydrosphinganine	C18H37NO2	C02934	0.45	0.245698	0.423322	0.816789	pos
p-Aminobenzoic acid	C7H7NO2	C00568	0.47	7.93349e-05	0.00166964	1.44272	pos
Sodium deoxycholate	C24H39O4. Na	C11171	0.47	0.143047	0.295793	1.1016	pos
Pyroglutamic acid	C5H7NO3	C01879	0.49	0.0932722	0.223412	1.07418	pos
Pentaporphyrin I	C19H21NO4	C09541	0.5	6.69771e-05	0.0015223	1.44369	pos
Qing Hau Sau	C15H22O5	C09538	0.51	0.295925	0.476945	0.748121	pos
4-Hydroxycinnamic acid	C9H8O3	C00811	0.52	0.408569	0.582434	0.608133	pos
Phytosphingosine	C18H39NO3	C12144	0.52	0.102493	0.238207	1.18959	pos
4-Hydroxycoumarin	C9H6O3	C20414	0.53	0.00724293	0.0371483	1.42922	pos
L-Isoleucine	C6H13NO2	C00407	0.55	0.234967	0.410761	0.832594	pos
Anabasine	C10H14N2	C06180	0.56	0.126768	0.273849	1.00727	pos
Pyridostigmine	C9H13N2O2	C07410	0.56	0.000318674	0.00406806	1.4323	pos
Pyridoxine	C8H11NO3	C00314	0.56	0.0294522	0.101306	1.36927	pos
Allantoin	C4H6N4O3	C01551	0.57	0.179377	0.343858	0.91711	pos
9-OxoODE	C18H30O3	C14766	0.59	5.95316e-05	0.00143241	1.44428	pos
2-Hydroxy-3-(4-hydroxyphenyl)propenoic acid	C9H8O4	C05350	0.59	0.000376348	0.00452774	1.4303	pos
Stearic acid	C18H36O2	C01530	0.6	0.00317191	0.0205267	1.38618	pos
Linoleic acid	C18H32O2	C01595	0.6	0.198988	0.368527	0.885968	pos
4-Hydroxyphenylpyruvic acid	C9H8O4	C01179	0.6	0.0743055	0.191384	1.11676	pos
Mirtazapine	C17H19N3	C07570	0.61	0.310077	0.490309	0.809892	pos
Triethylamine	C6H15N	C14691	0.63	0.63389	0.765206	0.362354	pos
3-Indoleacrylate	C11H9NO2	C21283	0.63	0.480249	0.644037	0.526776	pos
Niacinamide	C6H6N2O	C00153	0.64	0.576339	0.722828	0.422168	pos
psi-Pelletierine	C9H15NO	C10865	0.64	0.20084	0.370518	0.883514	pos
1-(3,4-Dihydroxyphenyl)-5-hydroxy-3-decanone	C16H24O4	C17748	0.66	0.046226	0.138209	1.1899	pos
beta-Sitosterol	C29H50O	C01753	0.67	0.22905	0.404512	0.841218	pos
Homoeriodictyol	C16H14O6	C09756	0.68	0.162919	0.322649	0.944226	pos
Cortexolone	C21H30O4	C05488	0.68	0.000806478	0.00771582	1.41958	pos
D-allo-Isoleucine	C6H13NO2	C21092	0.7	0.618759	0.753795	0.37791	pos
(2R,3R)-3-Methylglutamyl-5-semialdehyde-N6-lysine	C12H23N3O4	C20279	0.7	0.37162	0.548851	0.652462	pos
Glycylleucine	C8H16N2O3	C02155	0.71	0.00406024	0.024472	1.37714	pos
(2'E,4'Z,8E)-Colneleic acid	C18H30O3	C19827	0.71	0.187839	0.35445	0.903032	pos
12-Keto-tetrahydro-leukotriene B4	C20H32O4	C02165	0.71	0.202203	0.372001	0.881368	pos
Methyl cinnamate	C10H10O2	C06358	0.72	0.0016998	0.0129726	1.4044	pos
gamma-Aminobutyric acid	C4H9NO2	C00334	0.73	0.0132868	0.0575861	1.31443	pos
Aflatoxin B1	C17H12O6	C06800	0.73	0.0264493	0.0943322	1.25594	pos
2-Keto-6-acetamidocaproate	C8H13NO4	C05548	0.74	0.000178444	0.00277643	1.43764	pos
Methyl jasmonate	C13H20O3	C11512	0.74	0.782289	0.869954	0.212705	pos
Cyclopeptine	C17H16N2O2	C20579	0.74	0.0407044	0.127027	1.20707	pos
24,25-Dihydrolanosterol	C30H52O	C05109	0.74	0.401053	0.576345	0.617672	pos
4,5-Dihydroorotic acid	C5H6N2O4	C00337	0.74	0.15753	0.315825	0.952969	pos
Oleamide	C18H35NO	C19670	0.74	0.424211	0.59732	0.645705	pos
alpha-Tocopherol	C29H50O2	C02477	0.74	0.4909	0.653066	0.514508	pos
Paraxanthine	C7H8N4O2	C13747	0.75	0.313069	0.493031	0.805627	pos
Quercitrin	C21H20O11	C01750	0.75	0.0344818	0.112936	1.22707	pos
Hesperetin	C16H14O6	C01709	0.75	0.00374851	0.0230937	1.38025	pos
Cholesterol	C27H46O	C00187	0.75	0.603929	0.743429	0.39342	pos
Gabapentin	C9H17NO2	C07018	0.76	0.644307	0.773442	0.352107	pos
L-Tryptophan	C11H12N2O2	C00078	0.76	0.103129	0.239143	1.18767	pos
5-Methyl-2-furancarboxaldehyde	C6H6O2	C11115	0.76	0.214072	0.386548	0.862804	pos
L-Leucine	C6H13NO2	C00123	0.76	0.940485	0.96785	0.0571277	pos
L-Tyrosine	C9H11NO3	C00082	0.76	0.0933908	0.223555	1.07407	pos
5alpha-Cholestanone	C27H46O	C03238	0.76	0.569252	0.717565	0.430596	pos
Amino acid(Arg-)	C6H14N4O2	C02385	0.77	0.435366	0.606101	0.632913	pos
N(omega)-Nitro-L-arginine methyl ester	C7H15N5O4	C04337	0.77	0.299211	0.479843	0.822351	pos
Indole	C8H7N	C00463	0.77	0.00230287	0.0161032	1.39603	pos
Taurine	C2H7NO3S	C00245	0.77	0.00315221	0.0204562	1.38651	pos
(3S,5S)-Carbapenam-3-carboxylic acid	C7H9NO3	C17367	0.77	0.364614	0.542817	0.661212	pos
L-Arginine	C6H14N4O2	C00062	0.77	6.35938e-05	0.00147892	1.44391	pos
Erucic acid	C22H42O2	C08316	0.79	0.445762	0.61528	0.565628	pos
N,N-Dimethylaniline	C8H11N	C02846	0.79	0.895957	0.942012	0.100951	pos
Aminocaproic acid	C6H13NO2	C02378	0.8	0.845872	0.911173	0.149592	pos
Acetylcholine	C7H16NO2	C01996	0.8	0.267768	0.448304	0.785697	pos
3-Methyladenine	C6H7N5	C00913	0.81	0.745624	0.845697	0.249282	pos
Epsilon-caprolactam	C6H11NO	C06593	0.82	0.637308	0.767875	0.359388	pos
4-Oxoglutaramate	C5H7NO4	C05572	0.82	0.336453	0.516234	0.696489	pos
GMP	C10H14N5O8P	C00144	0.82	0.132755	0.281794	0.996796	pos
L-Proline	C5H9NO2	C00148	0.83	0.00838005	0.0413963	1.34347	pos
2-Acetamidofluorene	C15H13NO	C02778	0.83	0.0248555	0.090163	1.26234	pos
(R)-mandelic Acid	C8H8O3	C01983	0.85	0.955867	0.977426	0.0456259	pos
N-Alpha-acetyllysine	C8H16N2O3	C12989	0.84	0.131335	0.279908	0.999082	pos
L-Kynurenine	C10H12N2O3	C00328	0.85	0.554839	0.705567	0.445697	pos
Prostaglandin F2a	C20H34O5	C00639	0.85	0.288715	0.469968	0.758352	pos
m-Cresol	C7H8O	C01467	0.85	0.521527	0.678624	0.48142	pos
Creatinine	C4H7N3O	C00791	0.85	0.44867	0.617811	0.562993	pos
Glucose 6-phosphate	C6H13O9P	C00092	0.86	0.137812	0.288916	0.986779	pos
Chlorpromazine	C17H19ClN2S	C06906	0.85	0.132197	0.280923	0.997451	pos
4-Guanidinobutanal	C5H11N3O	C02647	0.86	0.616538	0.752403	0.379694	pos
Glutaric acid	C5H8O4	C00489	0.86	0.476076	0.640477	0.531622	pos
Homovanillic acid	C9H10O4	C05582	0.86	0.907066	0.948925	0.089986	pos
N-Acetyl-D-galactosamine	C8H15NO6	C01132	0.86	0.00395186	0.0240082	1.3784	pos
L-Methionine	C5H11NO2S	C00073	0.86	0.833739	0.903813	0.161413	pos
Guanine	C5H5N5O	C00242	0.87	0.01073	0.0496213	1.32893	pos
(S)-Norlaudanine	C19H23NO4	C21630	0.87	0.591837	0.734401	0.406345	pos
6-Phospho-beta-D-glucosyl-(1,4)-D-glucose	C12H23O14P	C04534	0.87	0.070194	0.184214	1.12682	pos
Ethylmethylacetic acid	C5H10O2	C18319	0.88	0.555017	0.705675	0.481345	pos
2-Hydroxyphenethylamine	C8H11NO	C02735	0.88	0.207726	0.378871	0.871846	pos
trans-Cinnamate	C9H8O2	C00423	0.89	0.839726	0.907372	0.156692	pos
Valeric acid	C5H10O2	C00803	0.89	0.958512	0.978689	0.0403692	pos
D-Alanyl-D-serine	C6H12N2O4	C19719	0.9	0.0683964	0.181303	1.13078	pos
(6Z)-Octadecenoic acid	C18H34O2	C08363	0.9	0.771554	0.862936	0.223627	pos
Maltol	C6H6O3	C11918	0.91	0.575459	0.722338	0.424	pos
N-methyl-L-glutamic Acid	C6H11NO4	C01046	0.92	0.913184	0.953564	0.0841623	pos
Quinic acid	C10H13NO	C06746	0.93	0.0353013	0.114711	1.22474	pos
Pyridoxal 5'-phosphate	C8H10NO6P	C00018	0.93	0.272057	0.452806	0.780891	pos
Alprenolol	C15H23NO2	D07156	0.94	0.313794	0.493714	0.725539	pos
Acetylcysteine	C5H9NO3S	C06809	0.95	0.349101	0.529	0.681068	pos
Diaminopimelic acid	C7H14N2O4	C00666	0.95	0.171562	0.334167	0.929981	pos
L-Lysine	C6H14N2O2	C00047	0.96	0.223938	0.398503	0.848869	pos
Isovaleric acid	C5H10O2	C08262	0.96	0.936651	0.965436	0.0620678	pos
2-Phenylethanol	C8H10O	C05853	0.98	0.961432	0.980099	0.0379925	pos
Adenosine 5'-phosphate disodium	C10H12N5O7P. 2Na		0.97	0.786333	0.872377	0.208869	pos
5-Aminoimidazole-4-carboxamide	C4H6N4O	C04051	0.98	0.632277	0.764151	0.363657	pos
4-Acetamido-2-aminobutanoic acid	C6H12N2O3	C06442	0.98	0.983292	0.991096	0.0169722	pos
L-Asparagine	C4H8N2O3	C00152	0.99	0.795206	0.878649	0.2004	pos
Tryptamine	C10H12N2	C00398	0.99	0.932332	0.963427	0.0656161	pos
Dibutyl phthalate	C16H22O4	C14214	0.99	0.772522	0.863624	0.221724	pos
L-Glutamic acid	C5H9NO4	C00025	1	0.932342	0.963427	0.0664422	pos
Octadecanamide	C18H37NO	C13846	1.02	0.683035	0.801543	0.311623	pos
L-Valine	C5H11NO2	C00183	1.02	0.752237	0.850295	0.241498	pos
3-Hydroxymethylglutaric acid	C6H10O5	C03761	1.03	0.769402	0.861286	0.239278	pos
4-Guanidinobutanoic acid	C5H11N3O2	C01035	1.03	0.674481	0.79554	0.320604	pos
Nornicotine	C9H12N2	C06524	1.03	0.89001	0.938213	0.106967	pos
Arachidic acid	C20H40O2	C06425	1.04	0.511127	0.670517	0.492414	pos
2-Aminophenol	C6H7NO	C01987	1.05	0.22252	0.397102	0.850817	pos
(9E)-Octadecenoic acid	C18H34O2	C01712	1.06	0.64999	0.777576	0.370686	pos
Phenylethylamine	C8H11N	C05332	1.06	0.557035	0.707417	0.475242	pos
Beta-Leucine	C6H13NO2	C02486	1.06	0.630202	0.76242	0.365917	pos
Indoleacetaldehyde	C10H9NO	C00637	1.07	0.072922	0.1891	1.11949	pos
(2S,5S)-trans-Carboxymethylproline	C7H11NO4	C17366	1.07	0.851569	0.915002	0.152301	pos
Senecionine	C18H25NO5	C06176	1.06	0.0519792	0.150216	1.17379	pos
(S)-3-Methyl-2-oxopentanoic acid	C6H10O3	C00671	1.07	0.634305	0.765404	0.362157	pos
2-Keto-6-aminocaproate	C6H11NO3	C03239	1.07	0.925607	0.96004	0.071655	pos
L-Carnitine	C7H15NO3	C00318	1.08	0.679878	0.799188	0.315782	pos
Chlorogenic acid	C16H18O9	C00852	1.09	0.346541	0.526514	0.682786	pos
7-Methylguanine	C6H7N5O	C02242	1.12	0.674228	0.795485	0.320745	pos
Deoxyuridine	C9H12N2O5	C00526	1.12	0.0349381	0.113921	1.22538	pos
5'-Methylthioadenosine	C11H15N5O3S	C00170	1.12	0.207692	0.37886	0.872563	pos
Glutathione	C10H17N3O6S	C00051	1.12	0.676395	0.797119	0.318026	pos
Pelargonic acid	C9H18O2	C01601	1.17	0.76755	0.860353	0.241496	pos
Methyldopa	C10H13NO4	C07194	1.17	0.444174	0.613736	0.620036	pos
Aspartame	C14H18N2O5	C11045	1.18	0.193515	0.361499	0.894698	pos
Pipecolic acid	C6H11NO2	C00408	1.19	0.640708	0.770696	0.355207	pos
1,2,3-Trihydroxybenzene	C6H6O3	C01108	1.19	0.449723	0.619093	0.612085	pos
L-Targinine	C7H16N4O2	C03884	1.21	0.00412208	0.0247336	1.37627	pos
L-Alanyl-gamma-D-glutamyl-L-lysine	C14H26N4O6	C21160	1.2	0.043776	0.133397	1.19746	pos
1-Hydroxy-2-naphthoate	C11H8O3	C03203	1.24	0.0010491	0.00934105	1.4146	pos
Nadolol	C17H27NO4	C07249	1.24	0.00421494	0.0250887	1.37545	pos
Choline	C5H14NO	C00114	1.24	8.64737e-05	0.00175842	1.44225	pos
L-Histidine	C6H9N3O2	C00135	1.25	0.0870043	0.212796	1.08723	pos
3-Methyl-L-tyrosine	C10H13NO3	C20800	1.25	0.23627	0.412191	0.929999	pos
Nicotinamide riboside	C11H15N2O5	C03150	1.26	0.350673	0.530436	0.678532	pos
Adenosine	C10H13N5O4	C00212	1.25	0.127981	0.275295	1.00515	pos
Oleic acid	C18H34O2	C00712	1.26	0.183416	0.348776	0.909852	pos
Aldosterone	C21H28O5	C01780	1.26	0.484235	0.647307	0.522399	pos
Quinoline	C9H7N	C06413	1.27	0.72162	0.828496	0.27257	pos
N-Acetylserotonin	C12H14N2O2	C00978	1.28	0.102466	0.238201	1.19114	pos
Tryptophanol	C10H11NO	C00955	1.29	0.00483693	0.0276895	1.36997	pos
2,6-Dimethylaniline	C8H11N	C11004	1.3	0.00103655	0.0092563	1.41487	pos
Diphenylamine	C12H11N	C11016	1.3	0.747071	0.84659	0.24667	pos
Spermidine	C7H19N3	C00315	1.32	0.381659	0.558058	0.640686	pos
N,N-Dimethylsphing-4-enine	C20H41NO2	C13914	1.33	0.626472	0.759732	0.370271	pos
Dodecanoic acid	C12H24O2	C02679	1.35	0.345765	0.52594	0.68461	pos
Methacholine	C8H18NO2	C07471	1.36	0.000575452	0.00609309	1.4247	pos
(2R,5S)-2,5-Diaminohexanoate	C6H14N2O2	C05161	1.38	0.471016	0.636534	0.536877	pos
Leucine	C6H13NO2	C16439	1.38	0.398881	0.573816	0.620589	pos
N6-Acetyl-L-lysine	C8H16N2O3	C02727	1.4	0.266173	0.446755	0.787976	pos
O-Phosphoethanolamine	C2H8NO4P	C00346	1.44	0.922584	0.958271	0.0745217	pos
Methoxamine	C11H17NO3	C07513	1.43	5.70086e-05	0.0014014	1.44433	pos
S-Carboxymethyl-L-cysteine	C5H9NO4S	C03727	1.45	0.050355	0.146883	1.17799	pos
Kojic acid	C6H6O4	C14516	1.46	0.328445	0.508558	0.705738	pos
Picolinic acid	C6H5NO2	C10164	1.55	0.380905	0.557243	0.707537	pos
Se-Methylselenocysteine	C4H9NO2Se	C05689	1.56	0.643583	0.772726	0.352732	pos
Traumatic Acid	C12H20O4	C16308	1.55	0.00460139	0.0266842	1.37192	pos
Farnesoic acid	C15H24O2	C16502	1.6	0.00253978	0.0173974	1.39324	pos
Tridemorph	C19H39NO	C11285	1.62	0.255707	0.434989	0.891858	pos
Dihydrouracil	C4H6N2O2	C00429	1.63	0.0852288	0.21017	1.09145	pos
2,3-Butanediol	C4H10O2S2	C00265	1.67	0.904798	0.947786	0.0923163	pos
Phenylpyruvic acid	C9H8O3	C00166	1.68	0.000300087	0.00390824	1.4327	pos
Celecoxib	C17H14F3N3O2S	C07589	1.68	0.000344418	0.00425288	1.4312	pos
Lupeol acetate	C32H52O2	C08630	1.68	0.000791262	0.0076372	1.41984	pos
Catechol	C6H6O2	C00090	1.8	0.176397	0.340428	0.921239	pos
Pregnanediol	C21H36O2	C05484	1.92	0.106276	0.243776	1.04728	pos
Penicillin N	C14H21N3O6S	C06564	2.05	0.0434475	0.13282	1.19886	pos
Citric acid	C6H8O7	C00158	2.26	0.128237	0.275578	1.00496	pos
Indoleacetic acid	C10H9NO2	C00954	2.29	0.000568508	0.00603764	1.42495	pos
Baicalein	C15H10O5	C10023	2.29	1.52262e-05	0.000651656	1.44878	pos
(2E)-Decenoyl-ACP	C6H11NO2	C03969	2.67	0.326586	0.507053	0.708502	pos
Nicotinic acid	C6H5NO2	C00253	2.76	0.842929	0.909382	0.1532	pos
Homoisocitrate	C7H10O7	C05662	2.84	0.000321637	0.00408164	1.43196	pos
allopurinol	C5H4N4O	C06816	2.87	0.116253	0.258322	1.16187	pos
Palmitoylethanolamide	C18H37NO2	C16512	3	0.0307911	0.104395	1.2396	pos
D-2-Hydroxyglutaric acid	C5H8O5	C01087	3.08	0.0847039	0.20919	1.2256	pos
Sinapate	C11H12O5	C00482	3.33	0.0170821	0.0686115	1.40416	pos
3,4-Methylenedioxyamphetamine	C11H15NO2	C07577	3.49	0.205073	0.375291	0.876623	pos
Dehypoxanthine futalosine	C14H16O7	C17010	3.65	3.3287e-05	0.00104007	1.44655	pos
Hydroxykynurenine	C10H12N2O4	C02794	3.71	0.0137707	0.0590853	1.40877	pos
Sinapyl alcohol	C11H14O4	C02325	4.13	0.0692573	0.182634	1.26881	pos
Hydroquinone	C6H6O2	C00530	4.64	0.0519951	0.150223	1.17393	pos
Luteolin	C15H10O6	C01514	5.07	3.25242e-05	0.00102461	1.4466	pos
Quinapril	C25H30N2O5	C07398	6.45	9.21037e-06	0.000495511	1.44976	pos
beta-Carotene	C40H56	C02094	7.47	0.0484012	0.142682	1.18389	pos
Fisetin	C15H10O6	C10041	12.75	0.000391119	0.00465051	1.45193	pos
2-Methylbenzoic acid	C8H8O2	C07215	17.73	2.23329e-05	0.00082516	1.4478	pos
Rutin	C27H30O16	C05625	43.81	6.84287e-07	0.000138313	1.45243	pos
N-Methylnicotinate	C7H7NO2	C01004	73.55	0.000796429	0.00766619	1.45049	pos
Kaempferol-3-O-rutinoside	C27H30O15	C21833	97.31	1.33374e-06	0.000201764	1.45203	pos
Ribose 1,5-bisphosphate	C5H12O11P2	C01151	0.13	3.73975e-05	0.000547492	1.46968	neg
Alpha-Tocotrienol	C29H44O2	C14153	0.18	0.00125302	0.00803858	1.47331	neg
Palmitoleic acid	C16H30O2	C08362	0.2	0.0184188	0.0699823	1.31012	neg
Guanidinosuccinic acid	C5H9N3O4	C03139	0.28	0.676419	0.821944	0.323776	neg
2-Heptanone	C7H14O	C08380	0.29	0.674646	0.820627	0.325325	neg
Cellobiose	C12H22O11	C00185	0.31	4.48159e-05	0.000618019	1.46899	neg
L-Xylonate	C5H10O6	C05411	0.31	0.000638371	0.00468995	1.44644	neg
5-Aminopentanoic acid	C5H11NO2	C00431	0.33	0.343294	0.553924	0.698734	neg
11-Dehydrocorticosterone	C21H28O4	C05490	0.33	4.18794e-05	0.000590709	1.46924	neg
Azelaic acid	C9H16O4	C08261	0.36	0.0113887	0.0477256	1.34639	neg
Mesaconate	C5H6O4	C01732	0.36	0.000760159	0.0053306	1.44366	neg
Ergocalciferol	C28H44O	C05441	0.42	0.0382302	0.124113	1.23432	neg
Quinate	C7H12O6	C00296	0.46	0.0893221	0.230314	1.1002	neg
N-Methyl-D-aspartic acid	C5H9NO4	C12269	0.47	0.251838	0.459633	0.821948	neg
Oxoglutaric acid	C5H6O5	C00026	0.5	7.39419e-05	0.000887016	1.46666	neg
all-trans-Retinoic acid	C20H28O2	C00777	0.52	0.0398612	0.128262	1.22896	neg
Palmitic acid	C16H32O2	C00249	0.52	0.0445855	0.14	1.21484	neg
Ascorbate	C6H8O6	C00072	0.53	9.15459e-05	0.0010532	1.46549	neg
Naringenin	C15H12O5	C00509	0.54	0.197569	0.397788	0.902357	neg
Shikimic acid	C7H10O5	C00493	0.55	0.00767022	0.0349201	1.36996	neg
Harman	C12H10N2	C09209	0.59	0.181059	0.376538	0.928656	neg
Thymidine	C10H14N2O5	C00214	0.61	0.00272779	0.0150349	1.41349	neg
D-Glucuronic Acid	C6H10O7	C00191	0.62	0.00112568	0.00735602	1.43631	neg
Maleamate	C4H5NO3	C01596	0.69	0.0320096	0.108716	1.25561	neg
gamma-Glutamylcysteine	C8H14N2O5S	C00669	0.7	0.239542	0.44508	0.839051	neg
4-Nitrophenol	C6H5NO3	C00870	0.72	0.112173	0.271235	1.05213	neg
3,4-Dihydroxybenzeneacetic acid	C8H8O4	C01161	0.71	0.0952405	0.240162	1.22809	neg
Fumaric acid	C4H4O4	C00122	0.72	0.00255089	0.0143007	1.41562	neg
10-Hydroxydecanoic acid	C10H20O3	C02774	0.72	0.00681841	0.0319364	1.37618	neg
L-Arabinose	C5H10O5	C00259	0.75	0.377126	0.586134	0.656167	neg
Sedoheptulose	C7H14O7	C02076	0.79	0.616325	0.780002	0.4146	neg
Oxoadipic acid	C6H8O5	C00322	0.8	0.413827	0.619337	0.612262	neg
D-Erythrulose	C4H8O4	C02022	0.81	0.474429	0.670561	0.54164	neg
Adenine	C5H5N5	C00147	0.84	0.724966	0.851005	0.274232	neg
Caproic acid	C6H12O2	C01585	0.84	0.898682	0.950828	0.10017	neg
Ciliatine	C2H8NO3P	C03557	0.86	0.585355	0.757273	0.419667	neg
Bovinic acid	C18H32O2	C04056	0.87	0.139737	0.313811	0.999595	neg
D-Glycero-D-galacto-heptitol	C7H16O7	C08255	0.88	0.0326147	0.110287	1.25333	neg
Succinic acid	C4H6O4	C00042	0.9	0.0872647	0.226712	1.10467	neg
D-Xylose	C5H10O5	C00181	0.91	0.0259479	0.0922889	1.27805	neg
D-Xylitol	C5H12O5	C00379	0.91	0.0425538	0.135375	1.2205	neg
Succinic acid semialdehyde	C4H6O3	C00232	0.91	0.804883	0.900012	0.193678	neg
Betaine	C5H11NO2	C00719	0.91	0.591305	0.76206	0.412854	neg
Fructose-1P	C6H12O6	C10906	0.95	0.575618	0.748983	0.429589	neg
6-Methylmercaptopurine	C6H6N4S	C16614	0.95	0.417825	0.622605	0.607009	neg
Oxaloglutarate	C7H8O7	C05533	0.96	0.811281	0.904168	0.186795	neg
L-Erythrulose	C4H8O4	C02045	0.97	0.63521	0.793548	0.366333	neg
Methyl beta-D-galactoside	C7H14O6	C03619	1.01	0.969316	0.983645	0.0301199	neg
Deoxyinosine	C10H12N4O4	C05512	1.01	0.934485	0.969154	0.0640554	neg
Guanosine	C10H13N5O5	C00387	1.01	0.894301	0.948194	0.103864	neg
D-Mannose	C6H12O6	C00159	1.02	0.727633	0.853488	0.271869	neg
D-Fructose	C6H12O6	C00095	1.09	0.251484	0.459258	0.822469	neg
2-Methoxyestradiol	C19H26O3	C05302	1.11	0.685135	0.82655	0.315321	neg
Gallic acid	C7H6O5	C01424	1.13	0.915885	0.960017	0.0822674	neg
2-O-(alpha-D-Mannosyl)-D-glycerate	C9H16O9	C11544	1.19	0.954363	0.977448	0.0452781	neg
LysoPA(16_0_0_0)	C19H39O7P	C04036	1.21	0.0550546	0.163523	1.18449	neg
Pantothenol	C9H19NO4	C05944	1.28	0.0425389	0.135375	1.22083	neg
Trehalose	C12H22O11	C01083	1.28	0.0212577	0.0787127	1.29791	neg
Terephthalate	C8H6O4	C06337	1.32	0.871746	0.939412	0.126915	neg
myo-Inositol	C6H12O6	C00137	1.35	0.657527	0.811085	0.34364	neg
Gluconic acid	C6H12O7	C00257	1.35	0.0019802	0.0116957	1.42328	neg
scyllo-Inositol	C6H12O6	C06153	1.44	0.409662	0.614742	0.617489	neg
L-Norvaline	C5H11NO2	C01826	1.47	0.341679	0.552232	0.700659	neg
Sorbitol	C6H14O6	C00794	1.71	0.599474	0.768372	0.40477	neg
D-Gulono-1,4-lactone	C6H10O6	C05410	1.74	0.0904831	0.232241	1.2296	neg
Quassin	C22H28O6	C08778	1.8	0.24316	0.449639	0.833923	neg
Galactitol	C6H14O6	C01697	1.82	0.194199	0.394141	0.907527	neg
2-Furoate	C5H4O3	C01546	1.84	0.00062039	0.00459014	1.44709	neg
Gluconolactone	C6H10O6	C00198	2.17	9.42416e-05	0.00107413	1.46546	neg
3,4-Dihydroxymandelic acid	C8H8O5	C05580	2.19	0.221579	0.425329	0.973909	neg
Protocatechuic acid	C7H6O4	C00230	2.24	5.10148e-05	0.000683014	1.46855	neg
Vaccenic acid	C18H34O2	C08367	2.38	0.21219	0.414845	0.879717	neg
Phenyl acetate	C8H8O2	C00548	2.47	0.00946272	0.0411695	1.35801	neg
D-Glucurono-6,3-lactone	C6H8O6	C02670	2.68	0.0515746	0.155656	1.32496	neg
D-Glucose	C6H12O6	C00031	2.7	0.787804	0.890384	0.210775	neg
Glycitein	C16H12O5	C14536	2.69	0.0774631	0.208344	1.26095	neg
L-Gulose	C6H12O6	C15923	2.78	0.540507	0.722854	0.468524	neg
Dehydroascorbate	C6H6O6	C05422	2.99	0.0782812	0.210088	1.26204	neg
L-Ribulose	C5H10O5	C00310	3.02	0.000759953	0.0053306	1.44375	neg
D-Galactose	C6H12O6	C00124	3.01	0.186777	0.384339	0.919717	neg
Oxalacetic acid	C4H4O5	C00036	3.04	0.229992	0.43447	0.853097	neg
2-Ketobutyric acid	C4H6O3	C00109	3.23	0.0400527	0.128744	1.22896	neg
dGMP	C10H14N5O7P	C00362	3.33	0.0722976	0.197635	1.14004	neg
Lichenin	C6H10O5	C00478	3.63	0.120305	0.284105	1.03651	neg
D-(+)-Glucose	C6H12O6	C00293	3.69	0.0175261	0.067336	1.31445	neg
Mannitol	C6H14O6	C00392	3.93	0.170487	0.361106	0.946569	neg
Alpha-D-Glucose	C6H12O6	C00267	4.07	0.0689543	0.191034	1.14827	neg
Neochlorogenic acid	C16H18O9	C17147	4.22	2.58881e-05	0.000427639	1.47097	neg
Taxifolin	C15H12O7	C01617	4.27	6.63124e-05	0.000825964	1.46725	neg
L-threo-3-Methylmalate	C5H8O5	C06029	4.32	0.0452892	0.141741	1.35119	neg
Caffeate	C9H8O4	C01197	4.58	0.164338	0.352623	1.08091	neg
2,4-Dinitrophenol	C6H4N2O5	C02496	5.51	0.000101794	0.00113517	1.46496	neg
Kaempferide	C16H12O6	C10098	6.04	0.000184119	0.00175539	1.46075	neg
L-Iditol	C6H14O6	C01507	6.09	0.0384274	0.124491	1.23399	neg
alpha-Ketoisovaleric acid	C5H8O3	C00141	6.26	4.86256e-06	0.000147985	1.47449	neg
Quercetin	C15H10O7	C00389	6.88	0.0115902	0.0483487	1.34556	neg
Galactaric acid	C6H10O8	C00879	6.92	0.00343252	0.0181713	1.40585	neg
Uracil	C4H4N2O2	C00106	7.77	0.0143431	0.0575556	1.43308	neg
L-Malic acid	C4H6O5	C00149	7.96	1.72085e-05	0.000320414	1.47216	neg
Cytidine	C9H13N3O5	C00475	10.6	1.66734e-07	2.74754e-05	1.47664	neg
Salicylic acid	C7H6O3	C00805	11.54	3.7137e-08	1.43395e-05	1.47689	neg
Isocitric acid	C6H8O7	C00311	16.56	0.000135468	0.00137879	1.46308	neg
(S)-Abscisic acid	C15H20O4	C06082	17.07	2.90448e-06	0.000107378	1.47509	neg
Dicumarol	C19H12O6	C00796	18.54	3.99249e-07	3.77005e-05	1.47637	neg
Gentisic acid	C7H6O4	C00628	19.23	7.10979e-05	0.00086126	1.46697	neg
2-Pyrocatechuic acid	C7H6O4	C00196	19.83	0.000300645	0.00262276	1.45616	neg
Hypoxanthine	C5H4N4O	C00262	30.11	8.09623e-06	0.000195479	1.4737	neg
4-Pyridoxic acid	C8H9NO4	C00847	41.15	7.95361e-08	1.80886e-05	1.47679	neg
L-Phenylalanine	C9H11NO2	C00079	141.3	0.000105669	0.00115939	1.47678	neg
Kynurenic acid	C10H7NO3	C01717	179.41	1.12521e-05	0.000238885	1.47312	neg
Xanthine	C5H4N4O2	C00385	245.96	4.68325e-08	1.52279e-05	1.47686	neg
Quercetin 3-O-glucoside	C21H20O12	C05623	282.06	3.11467e-05	0.000481061	1.47044	neg
Pantothenic acid	C9H17NO5	C00864	627.71	1.70531e-09	1.05354e-05	1.47707	neg
